# Supplementary material for: The Prognostic Role of Spot Urinary Sodium and Chloride in a Cohort of Hospitalized Advanced Heart Failure Patients: A Pilot Study
Source: MDPI journal article supplement (doi:10.3390/life13030698), 2023-03-05
Supplement: s1 [file s1]

# Supplementary Material

The prognostic role of spot urinary sodium and chloride in a cohort of hospitalized advanced heart failure patients: A pilot study

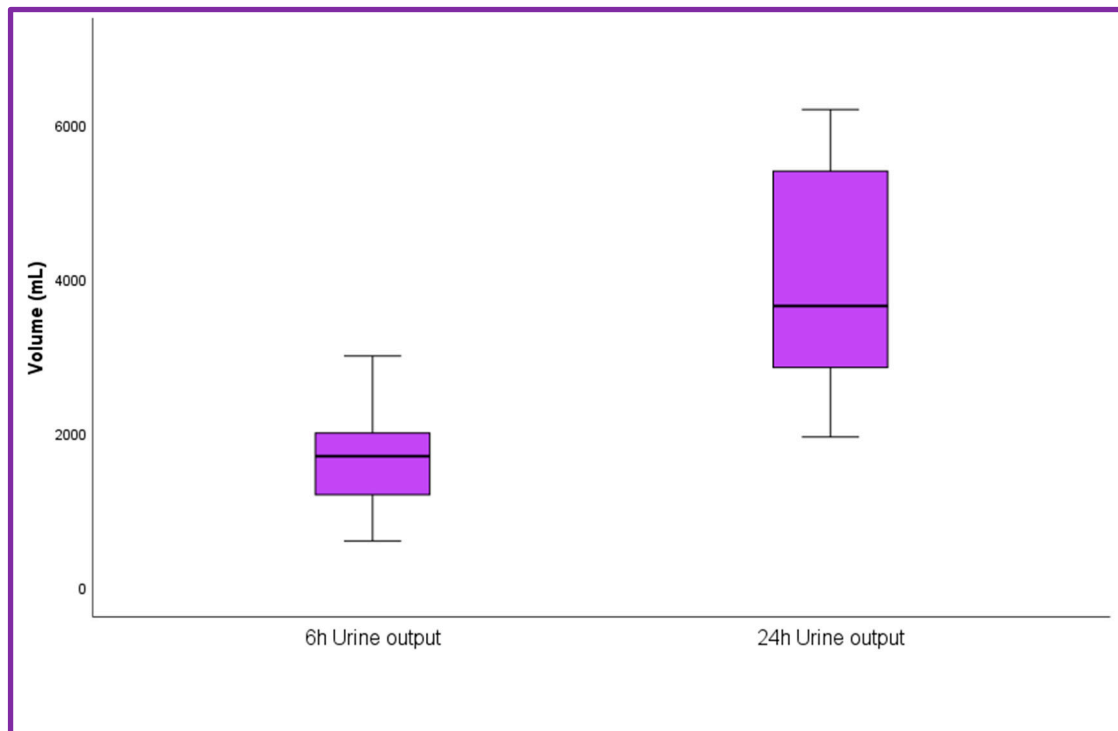

**Figure S1.** Box plots of the urine output at 6 and 24 hours after admission

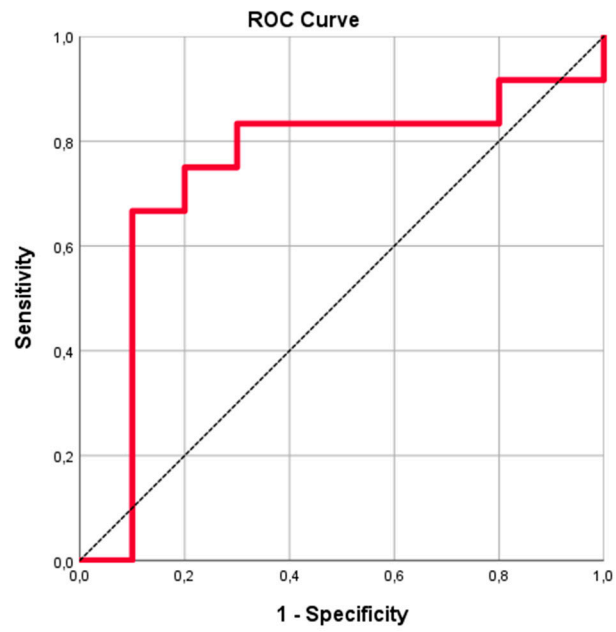

**Figure S2.** Spot urinary Na<sup>+</sup> at 24 hours. [AUC 0.74, 95%CI (0.50-0.97), p=0.056]

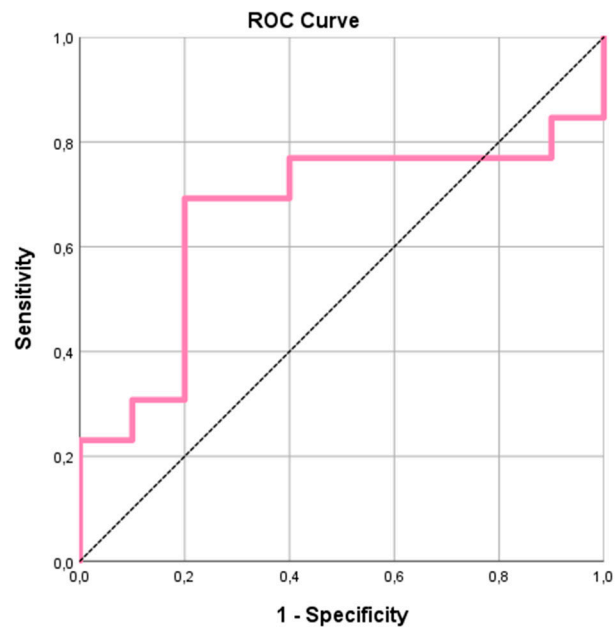

**Figure S3.** Spot urinary  $\text{Cl}^-$  at 24 hours. [AUC 0.66 (0.42-0.89),  $p=0.193$ ]

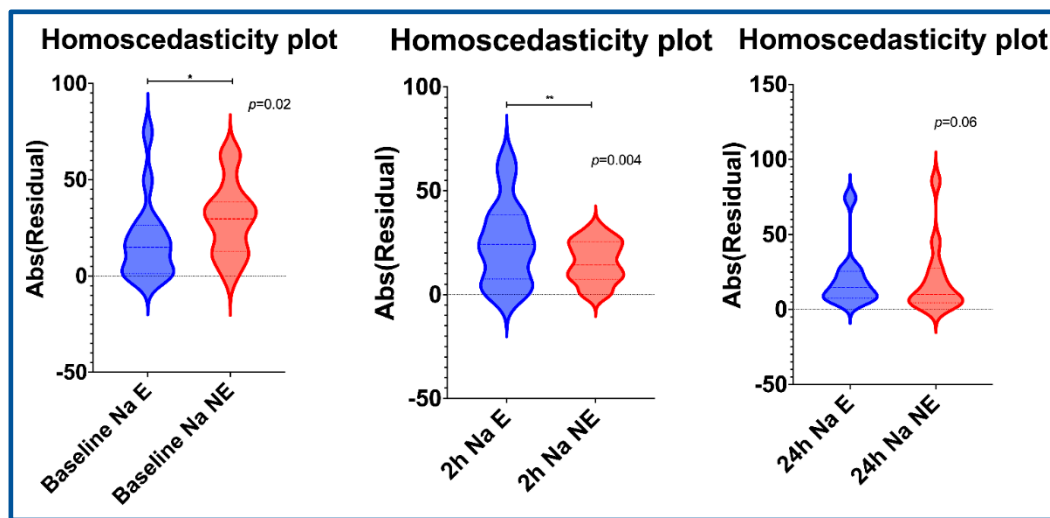

**Figure S4.** Homoscedasticity plot for spot urinary Na<sup>+</sup> at various time points.  
E: events, NE: non-events

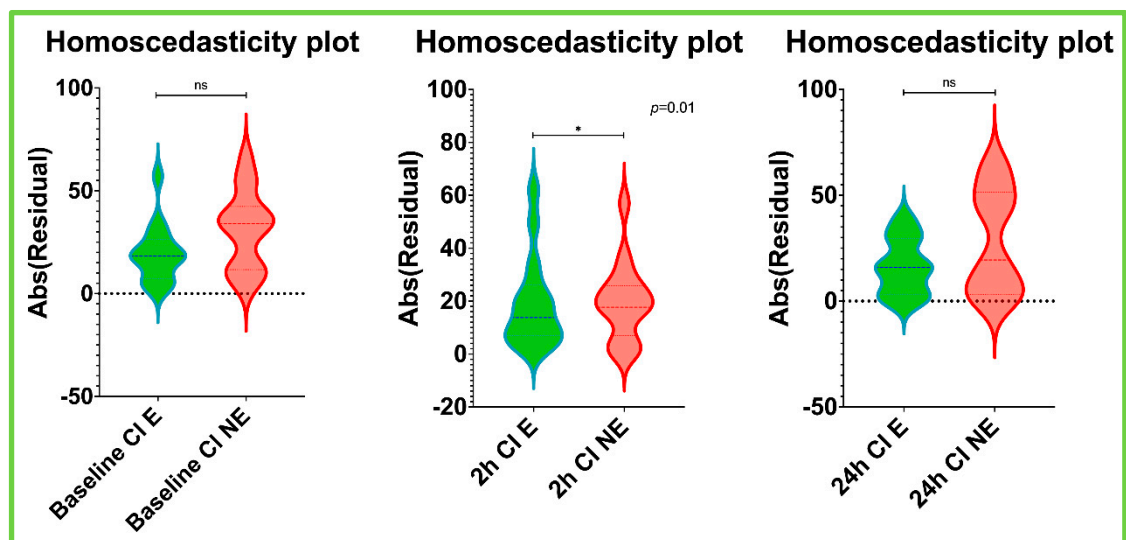

**Figure S5.** Homoscedasticity plot for spot urinary Cl<sup>-</sup> at various time points.  
E: events, NE: non-events
